# Supplementary material
Source: PubMed Central journal article supplement (PMC4190606)
Supplement: mmc1.pdf [file mmc1.pdf]

# **Supporting Material**

## **Computational Studies of the Effect of the S23D/S24D Troponin I Mutation on Cardiac Troponin Structural Dynamics**

**Yuanhua Cheng<sup>1,2</sup>, Steffen Lindert<sup>2,4</sup>, Peter Kekenes-Huskey<sup>2,4</sup>, Vijay S. Rao<sup>1</sup>, R. John Solaro<sup>6</sup>,  
Paul R. Rosevear<sup>5</sup>, Rommie Amaro<sup>2</sup>, Andrew D. McCulloch<sup>2,3</sup>, J. Andrew McCammon<sup>2,4</sup>,  
Michael Regnier<sup>1,\*</sup>**

<sup>1</sup>University of Washington, Department of Bioengineering, Seattle, WA, USA

<sup>2</sup>University of California San Diego, National Biomedical Computational Resource (NBCR),  
LaJolla, CA, USA

<sup>3</sup>University of California San Diego, Department of Bioengineering, LaJolla, CA, USA

<sup>4</sup>University of California San Diego, Department of Pharmacology, LaJolla, CA, USA

<sup>5</sup>University of Cincinnati, Department of Molecular Genetics, Biochemistry, and Microbiology,  
Cincinnati, OH, USA

<sup>6</sup>University of Illinois at Chicago, Department of Physiology and Biophysics, College of Medicine,  
Chicago, IL, USA

Running Head: Troponin phosphomimics simulations

Corresponding Author:

Michael Regnier, Ph.D. Department of Bioengineering, University of Washington, Box 358056, 850  
Republican St. Seattle, WA 98195. Email: [mregnier@uw.edu](mailto:mregnier@uw.edu)

| <b>Contents</b>                                                                                                                                                                                                                                                                                                                                                            | <b>Page</b> |
|----------------------------------------------------------------------------------------------------------------------------------------------------------------------------------------------------------------------------------------------------------------------------------------------------------------------------------------------------------------------------|-------------|
| <b>Figure S1.</b> The root-mean-square-displacement (RMSD) values of the backbone atoms (C, CA, N) for the two models with respect to the first snapshot as a function of time.                                                                                                                                                                                            | 3           |
| <b>Figure S2.</b> Distances between $\text{Ca}^{2+}$ and its coordinating cTnC site II residues (Asp 65, Asp 67, Asp 73 and Glu 76) over the course of each MD simulation for two complexes. Here, the 1 <sup>st</sup> run result is shown in black, the 2 <sup>nd</sup> run result is in red, and the 3 <sup>rd</sup> run result is in blue.                              | 4           |
| <b>Figure S3.</b> Contact maps of residue-residue pairs between the B- (residues 38-48) and C-helices (residues 54-64) of cTnC during each 150 ns MD simulation for two models. The blue end of the spectrum (value 0) reflects no contact between residue-residue pair, while the red end of the spectrum (value 1) represents 100% contact between residue-residue pair. | 5           |
| <b>Figure S4.</b> Contact maps of residue-residue pairs between NcTnC (cTnC residues 1-89) and NcTnI (cTnI residues 1-41) during each 150 ns MD simulation for two models.                                                                                                                                                                                                 | 6           |
| <b>Figure S5.</b> The average angles and distances between the B- (residues 38-48) and C-helices (residues 54-64) of cTnC during 150 ns MD simulations for two models.                                                                                                                                                                                                     | 7           |
| <b>Figure S6.</b> Contact maps of residue-residue pairs between NcTnC and the switch peptide of cTnI (cTnI residues 148-164) during each 150 ns MD simulation for two models.                                                                                                                                                                                              | 8           |
| <b>Figure S7.</b> The average angles and distances between the A- (residues 14-28) and B-helices (residues 38-48) of cTnC during 150 ns MD simulations for two models.                                                                                                                                                                                                     | 9           |
| <b>Figure S8.</b> The average solvent accessible surface area (SASA) values for two models.                                                                                                                                                                                                                                                                                | 10          |
| <b>Figure S9.</b> Contact maps of residue-residue pairs between cTnC and the inhibitory peptide of cTnI (cTnI residues 138-147) during each 150 ns MD simulation for two models.                                                                                                                                                                                           | 11          |

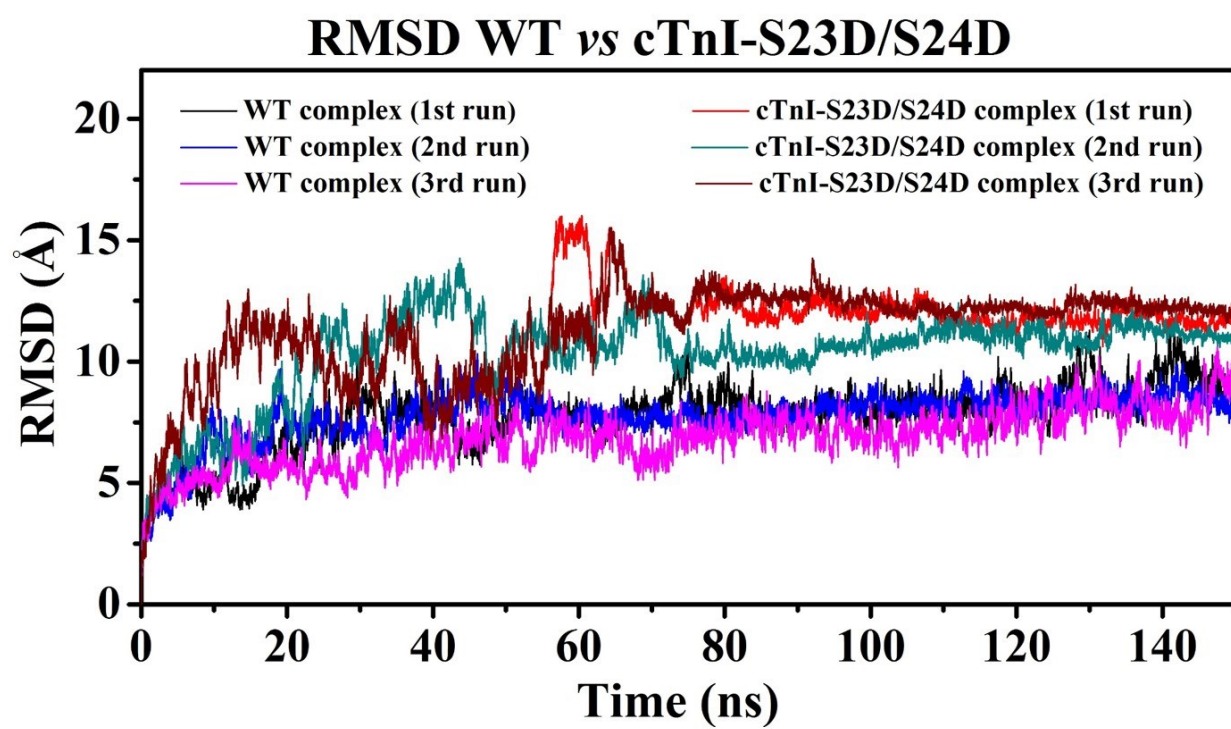

**Figure S1**

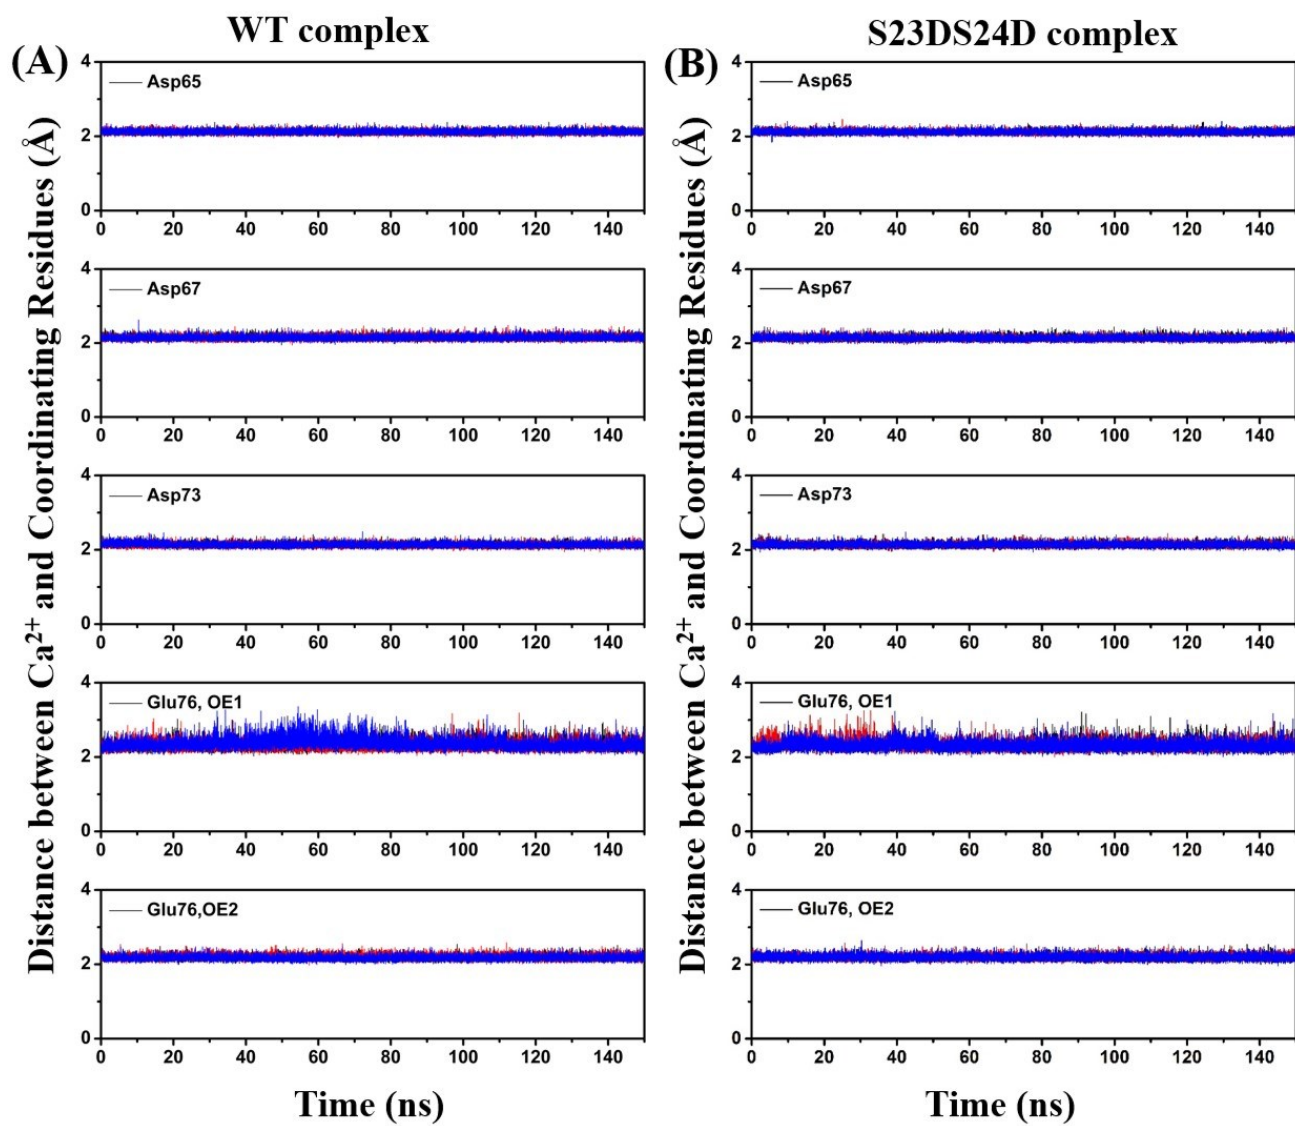

**Figure S2**

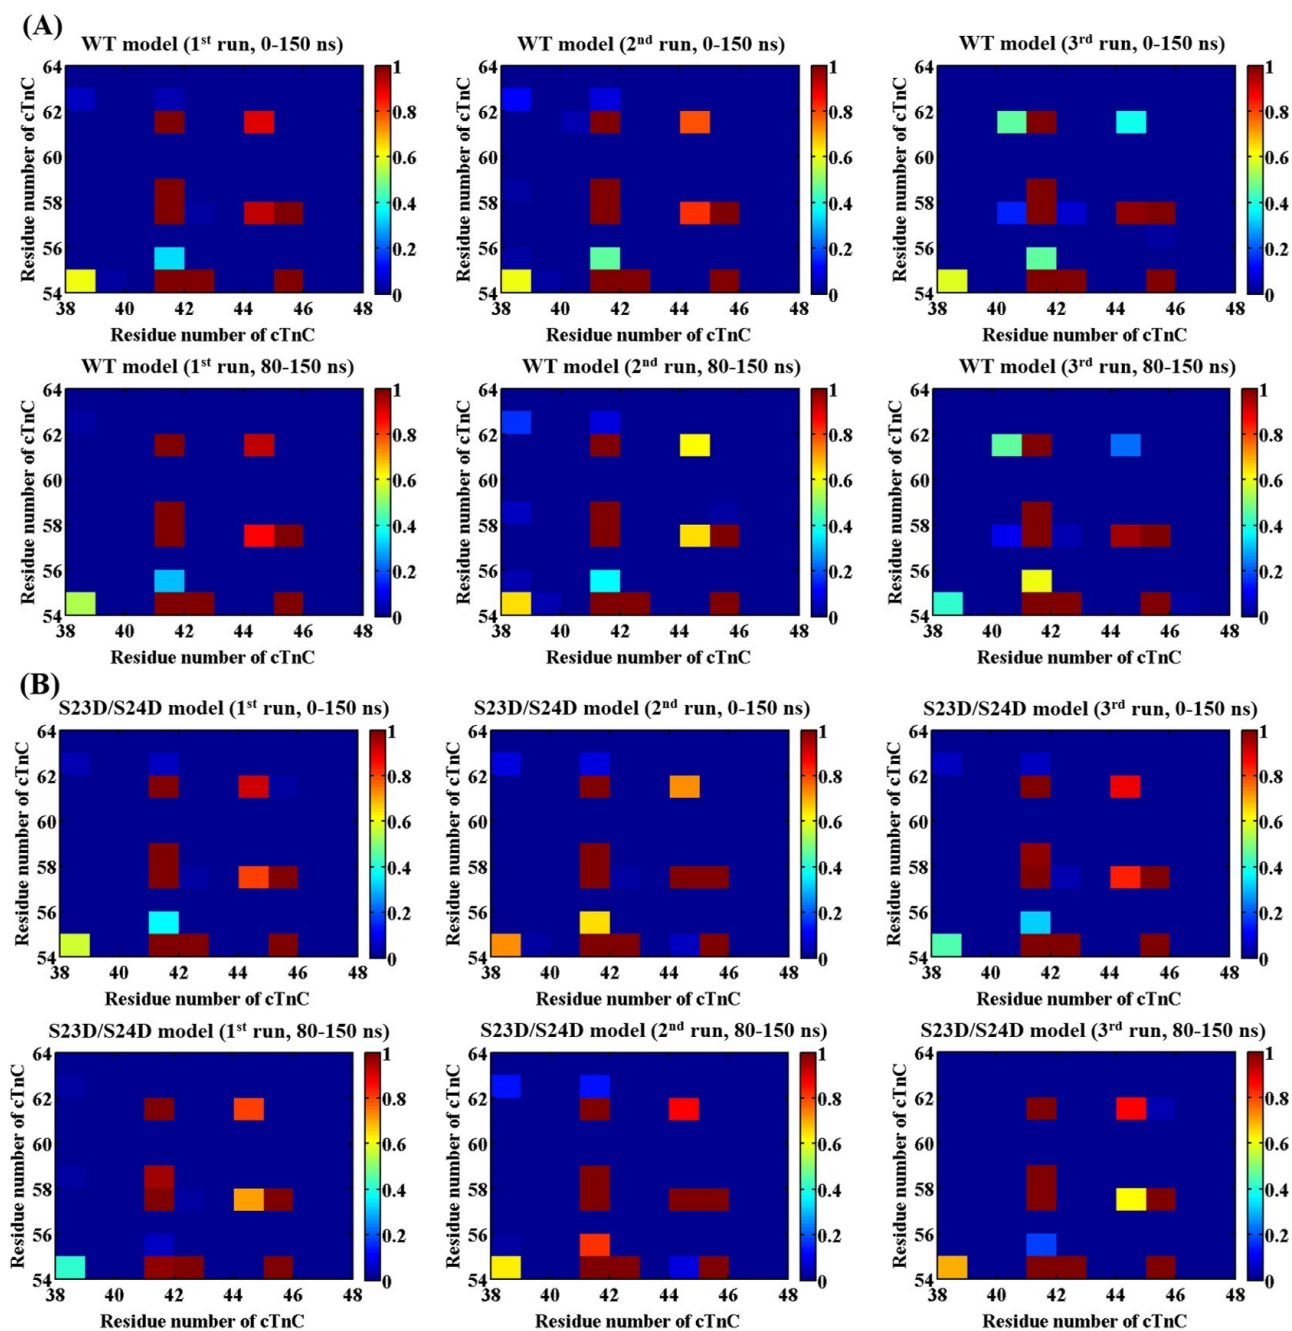

**Figure S3**

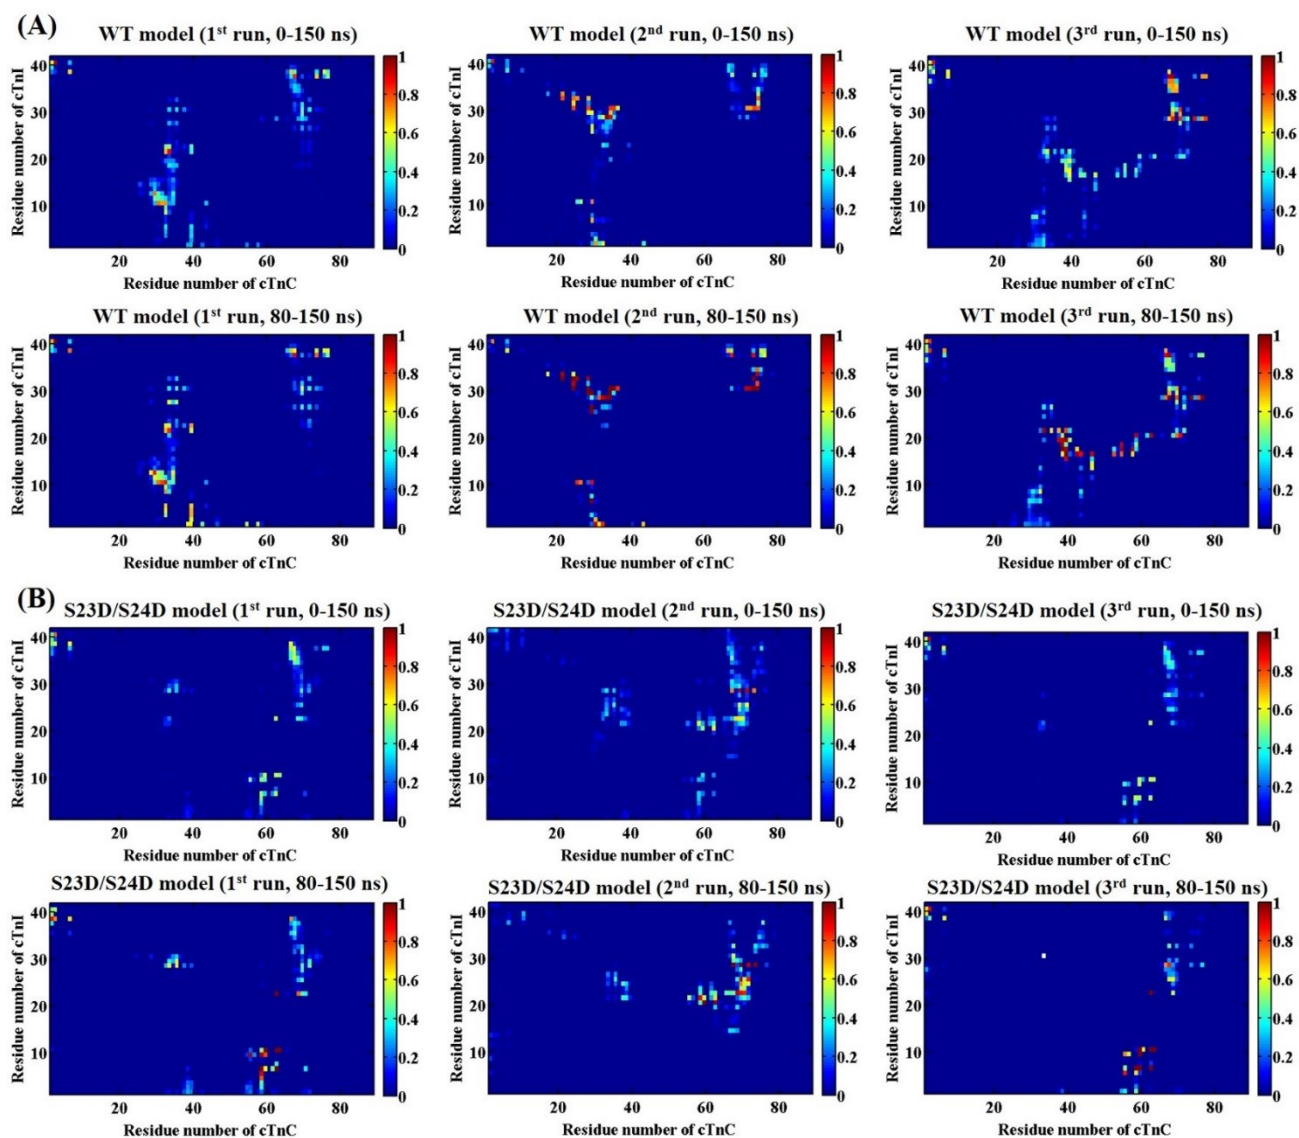

**Figure S4**

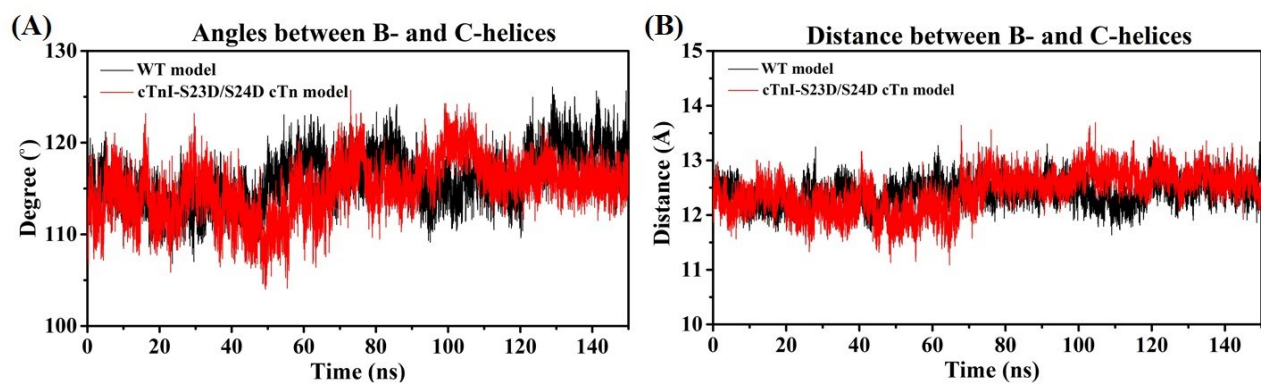

**Figure S5**

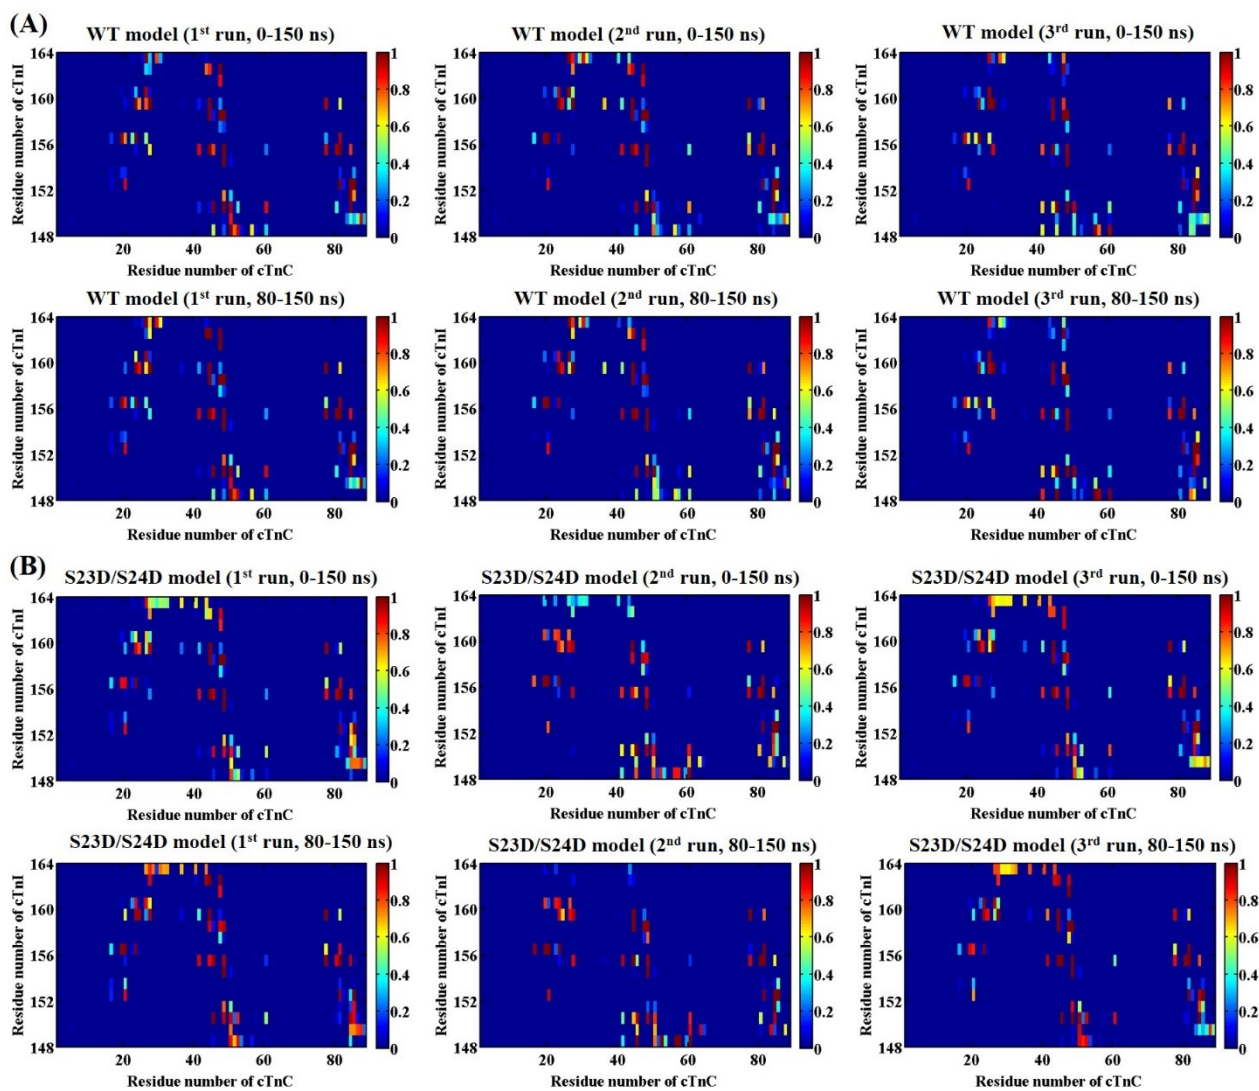

**Figure S6**

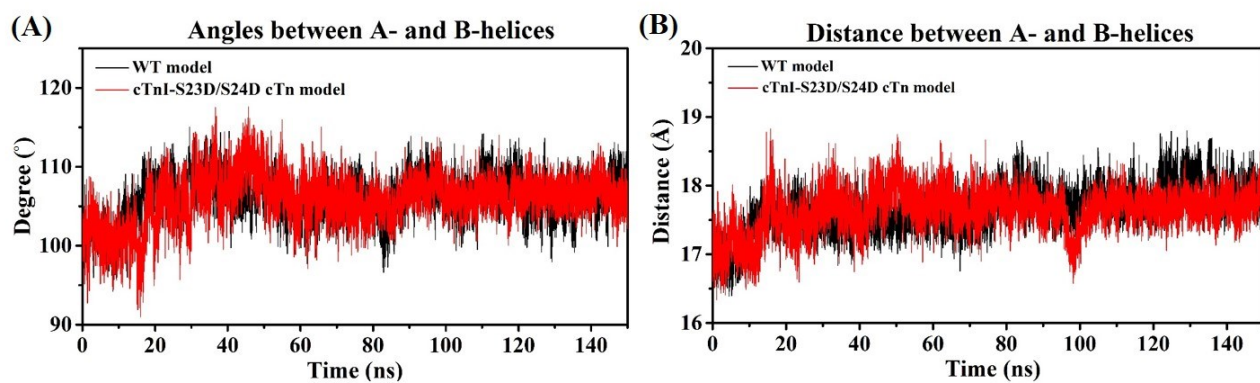

**Figure S7**

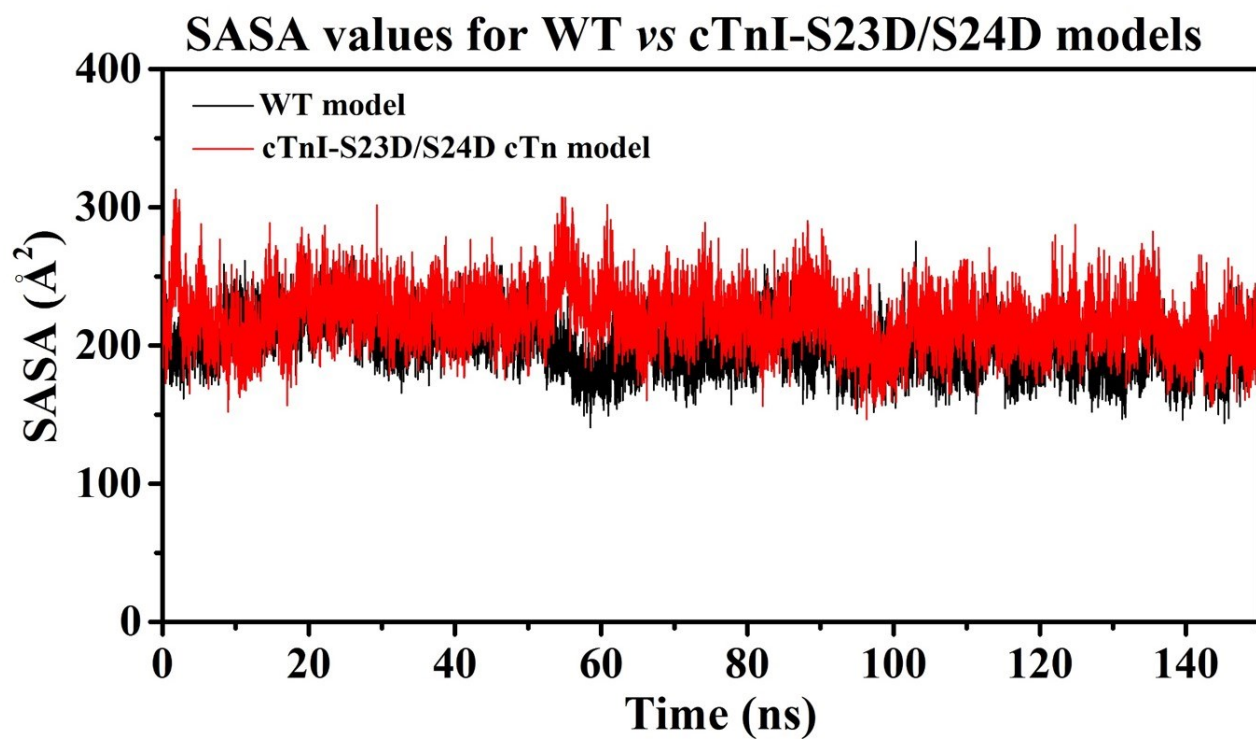

**Figure S8**

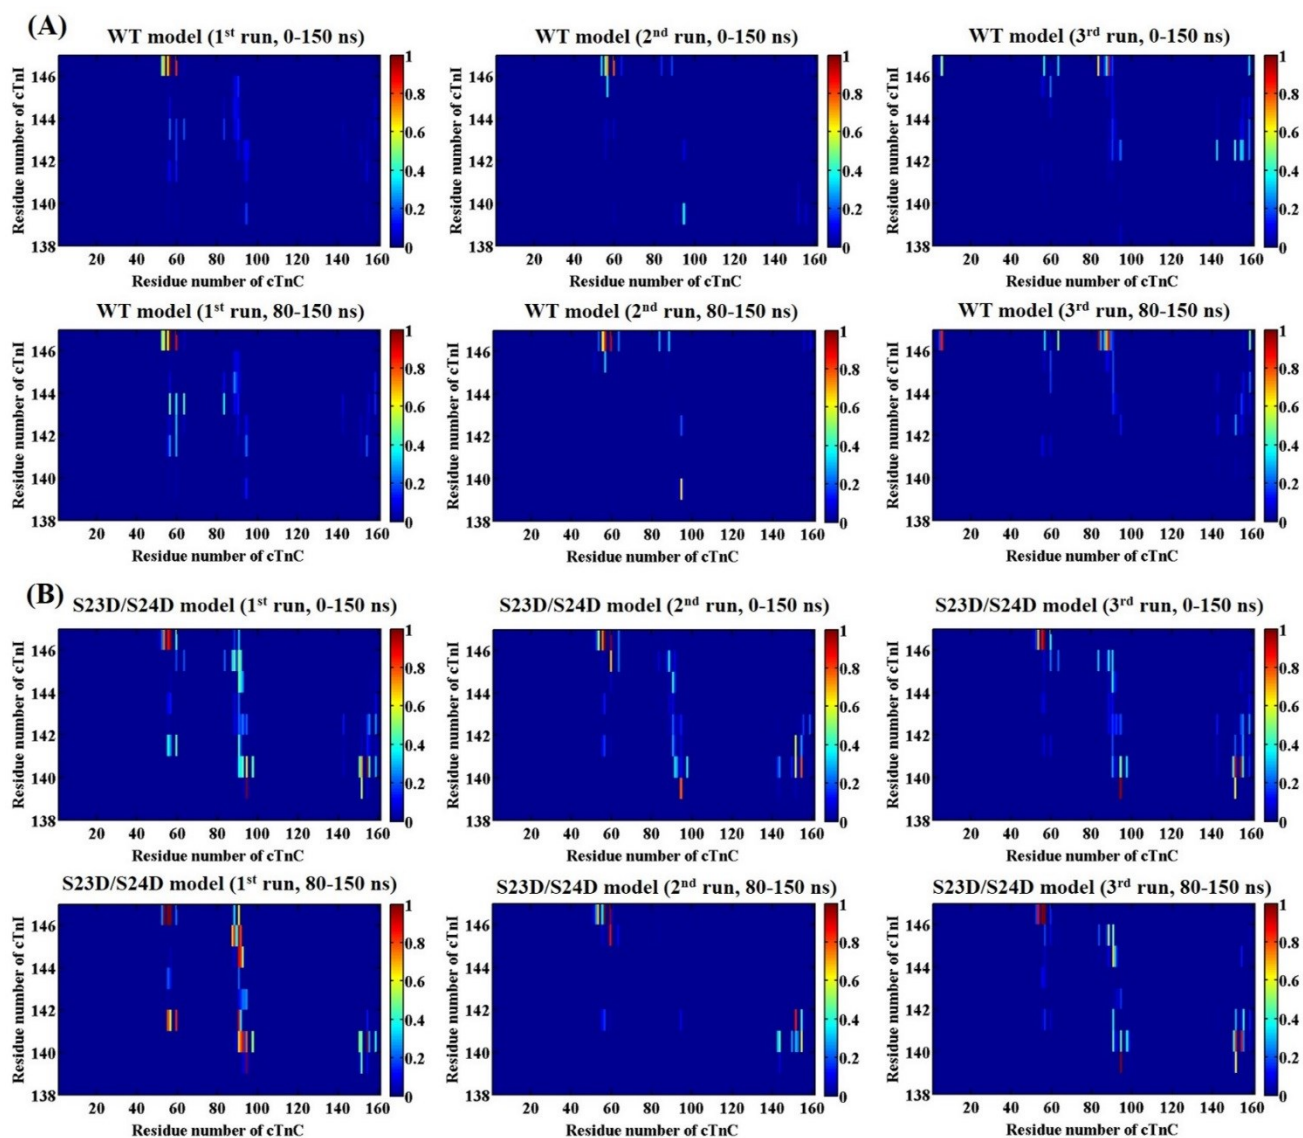

**Figure S9**
